# Supplementary material for: Plant Aquaporin Gating Is Reversed by Phosphorylation on Intracellular Loop D—Evidence from Molecular Dynamics Simulations
Source: MDPI journal article supplement (doi:10.3390/ijms241813798), 2023-09-07
Supplement: s1 [file s1]

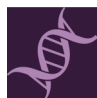

## Supplementary Materials

**Video S1. Opening of chain D.** Schematic representation of *SoPIP2*;1 tetrameric assembly extracted from experimental setup 1 simulation from time  $t_{start} = 500$  nanoseconds to time  $t_{end} = 600$  nanoseconds. Each monomer is colored differently : in orange, chain A; in purple, chain B; in gray, chain C and in blue, chain D. Side chains of residues phosphorylated serine 188, arginine 187 and arginine 190 are represented. For chain D (in blue), we can see the establishment of salt bridges between phosphorylated serine 188 and arginine 187 first and then between phosphorylated serine 188 and arginine 190.
